# Supplementary material for: Sustainability in Jordan’s Municipal Solid Waste Management System: Reduction of Methane Emissions and Benefits to Public Health
Source: Research Square preprint supplement (doi:10.21203/rs.3.rs-9283805/v1), 2026-04-13
Supplement: Supplementary file 1 [file 7468212adb958618d9107794.docx]

**Table 1:** Municipal Solid Waste Data for Jordan.

| Items | Quantity for 2019 (tons/a) | Quantity for 2020 (tons/a) | Quantity for 2021 (tons/a) | Quantity for 2022 (tons/a) | Quantity for 2023 (tons/a) |
| --- | --- | --- | --- | --- | --- |
| Waste Landfilled according to MoLA | 1,662,939 | 1,795,410 | 2,649,479 | 2,914,427 | 1,732,412.5 |
| Waste buried in landfill boundaries of the GAM | 1,456,074 | 1374835 | 1,350,539 | 1,368,886 | 1,406,023 |
| Total (MSW) Disposed in Landfills in Jordan | 3119013 | 3251484 | 4105553 | 4370501 | 3188487 |

Table 2: Population Growth Data with Disease Date and economic data for Jordan.

| Data | Units | 2022 | 2030 | 2040 | 2050 |
| --- | --- | --- | --- | --- | --- |
| Population | m People | 11.345 | 13.45124 | 16.72135 | 20.78645 |
| Population Growth | %/a | 2 | 2.32909 | 2.895311 | 3.599185 |
| Respiratory Disease Ozone Relative Risk | Rate (%) | 1.04 | 1.04 | 1.04 | 1.04 |
| GDP | USD | 49.375 | 60.210 | 76.325 | 96.754 |
| GDP Growth | %/a | 2.4 | 2.83342 | 3.591786 | 4.55313 |
| Average Income | USD/Person | 4352.1375 | 4476.179 | 4564.55 | 4654.667 |

Table 3: Summary of listing of different mitigation options of methane reduction in Jordan (2020 to 2050).

| Action Number | Action Title |
| --- | --- |
| Short-Term Scenario | |
| 1 | Biogas from Salt Treatment Plant |
| 2 | Recycling Bank Project in Amman |
| 3 | Organic Waste Processing Plant (MBT) in Amman |
| 4 | Regulation of Informal Waste Collectors |
| 5 | Enhancing Operations of RUA Waste Management Company |
| 6 | Methane Gas Collection at Al-Ekeider Landfill |
| 7 | Management of Studies and Awareness on Solid Waste |
| Sub-Total short-term actions | |
| Mid-Term Scenario | |
| 1 | Transforming Landfills into Engineered Sanitary Landfills |
| 2 | Development of Waste Transfer Stations |
| 3 | GPS-Based Guidance System |
| 4 | National Waste Management Center |
| 5 | Biogas Collection from Al-Husainiyat Landfill |
| Sub-Total Mid-term actions | |
| Long-Term Scenario | |
| 1 | Promoting Circular Economy for Waste |
| 2 | Utilizing Biomass in Cement Factories |

Table 4: Inventory of Methane Baseline Scenario.

| Branch: Non-Energy\Waste\Methane from MSW in Landfills Units: Thousand Metric Tons CO2 Equivalent | | | | |
| --- | --- | --- | --- | --- |
| Year | 2020 | 2030 | 2040 | 2050 |
| Methane Base line Scenario | 4,317.58 | 5,028.02 | 6,250.37 | 7,769.88 |

**Health Data**

Data by health and age group was used to accurately simulate premature deaths and DALYs totaled. Incidence rates were taken from WHO and national statistics and adjusted to reflect the country’s population distribution as shown in table.

Table 5: WHO Health Data Input Parameters for LEAP Analysis (2022 Baseline, per 100,000 population)

| **Disease** | **Gender** | **Less than 5 years** | **Age 6 to 29 years** | **Age 30 to 34 years** | **Age 35 to 39 years** | **Age 40 to 44 years** | **Age 45 to 49 years** | **Age 50 to 54 years** | **Age 55 to 59 years** | **Age 60 to 64 years** | **Age 65 to 69 years** | **Age 70 to 74 years** | **Age 75 to 79 years** | **More than 80 years** |
| --- | --- | --- | --- | --- | --- | --- | --- | --- | --- | --- | --- | --- | --- | --- |
| **ALRI Disease Rate** | Female | 2.19 e-04 |  |  |  |  |  |  |  |  |  |  |  |  |
| **ALRI Disease Rate** | Male | 2.19 e-04 |  |  |  |  |  |  |  |  |  |  |  |  |
| **COPD Rate** | Female |  | 1.37e-06 | 3.84e-06 | 2.54e-06 | 5.73e-06 | 1.20e-05 | 2.10e-05 | 4.25e-05 | 9.20e-05 | 0.000140 | 0.000348 | 0.000613 | 0.001814 |
| **COPD Rate** | Male |  | 2.00e-06 | 6.00e-06 | 9.00e-06 | 1.50e-05 | 2.70e-05 | 5.60e-05 | 0.0001 | 0.000241 | 0.000448 | 0.000841 | 0.001249 | 0.002790 |
| **Cardiopulmonary Disease Rate** | Female |  | 1.04e-05 | 2.58e-05 | 2.98e-05 | 7.55e-05 | 0.00018 | 0.00032 | 0.00063 | 0.001232 | 0.002370 | 0.004524 | 0.007127 | 0.012544 |
| **Cardiopulmonary Disease Rate** | Male |  | 1.00e-06 | 2.00e-06 | 3.00e-06 | 4.00e-06 | 7.00e-06 | 1.30e-05 | 2.20e-05 | 4.30e-05 | 7.20e-05 | 0.000142 | 0.000187 | 0.000381 |
| **Ischaemic Heart Disease Rate** | Female |  | 1.89e-05 | 2.58e-05 | 2.98e-05 | 7.55e-05 | 0.000184 | 0.000318 | 0.000627 | 0.001232 | 0.002037 | 0.005424 | 0.007127 | 0.020054 |
| **Ischaemic Heart Disease Rate** | Male |  | 1.80e-05 | 9.10e-05 | 0.000179 | 0.000347 | 0.000633 | 0.001038 | 0.001521 | 0.002459 | 0.003705 | 0.005605 | 0.007421 | 0.011688 |
| **Lung Cancer Rate** | Female |  | 1.10e-06 | 3.70e-06 | 6.10e-06 | 1.48e-05 | 3.48e-05 | 5.76e-05 | 9.58e-05 | 0.000157 | 0.000208 | 0.000342 | 0.000396 | 0.000526 |
| **Lung Cancer Rate** | Male |  | 2.00e-06 | 8.00e-06 | 1.70e-05 | 4.00e-05 | 0.000100 | 0.0002 | 0.00033 | 0.000604 | 0.000863 | 0.001241 | 0.001257 | 0.001368 |
| **Respiratory Disease Rate** | Female |  | 1.30e-05 | 1.60e-05 | 1.50e-05 | 2.50e-05 | 4.00e-05 | 4.90e-05 | 7.70e-05 | 0.000142 | 0.000209 | 0.000534 | 0.000945 | 0.003191 |
| **Respiratory Disease Rate** | Male |  | 1.40e-05 | 2.60e-05 | 3.40e-05 | 3.90e-05 | 4.70e-05 | 6.70e-05 | 0.00010 | 0.000183 | 0.000299 | 0.000603 | 0.000993 | 0.003027 |
| **Stroke Rate** | Female |  | 8.50e-06 | 2.25e-05 | 2.70e-05 | 6.46e-05 | 0.00014 | 0.00022 | 0.00045 | 0.000929 | 0.001565 | 0.003927 | 0.006641 | 0.019000 |
| **Stroke Rate** | Male |  | 1.00e-05 | 3.00e-05 | 5.00e-05 | 8.00e-05 | 0.00014 | 0.00026 | 0.00045 | 0.000950 | 0.001700 | 0.003360 | 0.005470 | 0.012430 |

Table 6: Summary of the activities' impact on methane reduction in Jordan (2020 to 2050).

| Action Number | Action Title | Methane Reduction (Gg CO2 Equivalent/year) |
| --- | --- | --- |
| Short-Term Scenario | | |
| 1 | Biogas from Salt Treatment Plant | 19.87 |
| 2 | Recycling Bank Project in Amman | 301.68 |
| 3 | Organic Waste Processing Plant (MBT) in Amman | 301.68 |
| 4 | Regulation of Informal Waste Collectors | 150.84 |
| 5 | Enhancing Operations of RUA Waste Management Company | 150.84 |
| 6 | Methane Gas Collection at Al-Ekeider Landfill | 754.2 |
| 7 | Management of Studies and Awareness on Solid Waste | 150.84 |
| Sub-Total short-term actions | | **1810.08** |
| Mid-Term Scenario | | |
| 1 | Transforming Landfills into Engineered Sanitary Landfills | 876.44 |
| 2 | Development of Waste Transfer Stations | 175.29 |
| 3 | GPS-Based Guidance System | 87.64 |
| 4 | National Waste Management Center | 175.29 |
| 5 | Biogas Collection from Al-Husainiyat Landfill | 175.29 |
| Sub-Total Mid-term actions | | **1,489.94** |
| Long-Term Scenario | | |
| 1 | Promoting Circular Economy for Waste | 172.56 |
| 2 | Utilizing Biomass in Cement Factories | 862.81 |
| Sub-Total Long-term actions | | **1035.37** |
| Total Reduction in Waste and Wastewater Sector | | **4335.39** |

Table 7: Yearly Methane Emissions

Strategies Scenarios (2025–2050)

| unit is Annual Methane Emissions (ton/yr) | Year | | | | | |
| --- | --- | --- | --- | --- | --- | --- |
| 2025 | 2030 | 2035 | 2040 | 2045 | 2050 |
| BASELINE Scenario | 59,500 | 66,300 | 73000 | 79700 | 86500 | 93500 |
| Scenario Composting Focus | 59,500 | 54500 | 51200 | 49500 | 49000 | 49500 |
| Scenario Recycling Focus | 59,500 | 57400 | 56600 | 56900 | 58300 | 60400 |
| Scenario Anaerobic Digestion | 59,500 | 55400 | 53000 | 52000 | 52200 | 53300 |
| Scenario Incineration with Energy Recovery | 59,500 | 53400 | 49000 | 46400 | 45100 | 44900 |

Table 8: Global Temperature Change due to Country Emissions due to MSWM

| Branch: Indicators\Climate Impacts\Global Temperature Change due to Country Emissions | | | | |
| --- | --- | --- | --- | --- |
| Units: Degree C | Year | | | |
| 2020 | 2030 | 2040 | 2050 |
|  | 0.00752 | 0.23015 | 0.54136 | 0.99999 |
| direct | 0.00513 | 0.12673 | 0.22259 | 0.31992 |
| Organic Carbon Aerosol | 0.00001 | -0.00642 | -0.03130 | -0.06946 |
| Aerosol | -0.00002 | -0.01475 | -0.10234 | -0.26704 |
| Aerosol | -0.00001 | -0.00318 | -0.01841 | -0.04562 |
| Aerosol | -0.00001 | -0.00321 | -0.01067 | -0.02054 |
| Ozone | 0.00001 | 0.00398 | 0.02396 | 0.05945 |
|  | - | 0.00029 | 0.00147 | 0.00331 |
|  | 0.00000 | 0.00027 | 0.00127 | 0.00287 |
|  | - | -0.00361 | -0.02306 | -0.05807 |
|  | 0.00001 | 0.00029 | 0.00073 | 0.00137 |
| HFC134A | - | 0.00000 | 0.00001 | 0.00001 |
| Total | 0.01266 | 0.36826 | 0.83799 | 1.50668 |
